# Supplementary material
Source: MDPI journal article supplement (https://www.mdpi.com/2077-1312/10/6/838)
Supplement: s1 [file s1]

**Table S1.** The detail information of 16S rRNA gene sequences for all samples.

| <b>sample</b> | <b>clean_tags</b> | <b>singleton%</b> | <b>chimeras%</b> | <b>Effective_tags</b> | <b>OTUs</b> |
|---------------|-------------------|-------------------|------------------|-----------------------|-------------|
| NP-1          | 129360 ± 38390    | 12.9 ± 3.0        | 0.9 ± 0.6        | 110071 ± 29399        | 350±90      |
| NP-2          | 165016 ± 7095     | 12.4 ± 0.2        | 0.0 ± 0.0        | 144516 ± 6596         | 324 ± 18    |
| NP-3          | 79459 ± 2292      | 1.1 ± 0.7         | 1.3 ± 1.6        | 77554 ± 1313          | 217 ± 22    |
| YCR1          | 81558 ± 779       | 2.5 ± 0.3         | 0.8 ± 0.3        | 78885 ± 973           | 66 ± 11     |
| YCR2          | 94343 ± 48465     | 10.4 ± 2.1        | 0.4 ± 0.3        | 83208 ± 40808         | 187 ± 158   |
| YCG3          | 90605 ± 3067      | 3.3 ± 0.3         | 1.2 ± 0.3        | 86560 ± 3338          | 68 ± 5      |
| SW-1          | 67819 ± 797       | 3.8 ± 0.4         | 0.6 ± 0.0        | 64801 ± 555           | 850 ± 34    |
| SW-2          | 67686 ± 3452      | 4.3 ± 1.3         | 1.0 ± 0.4        | 64061 ± 3077          | 708 ± 195   |
| SW-3          | 64041 ± 2515      | 2.5 ± 1.8         | 0.1 ± 0.1        | 62311 ± 2322          | 401 ± 129   |

Data are expressed as mean ± SD (n = 3).
